# Supplementary material
Source: MDPI journal article supplement (https://www.mdpi.com/2073-4344/11/12/1421)
Supplement: s1 [file s1]

# A Novel Heterogeneous Superoxide Support-Coated Catalyst for Production of Biodiesel from Roasted and Unroasted *Sinapis arvensis* Seed Oil

Maryam Hanif <sup>1,2</sup>, Haq Nawaz Bhatti <sup>1,\*</sup>, Muhammad Asif Hanif <sup>2</sup>, Umer Rashid <sup>3,\*</sup>, Asma Hanif <sup>4</sup>, Bryan R. Moser <sup>5</sup>, and Ali Alsalmeh <sup>6</sup>

- <sup>1</sup> Environmental Chemistry Lab, Department of Chemistry, University of Agriculture, Faisalabad-38040-Pakistan. maryam\_ranahanif@yahoo.com (M.H.); haq\_nawaz@uaf.edu.pk (H.N.B.)
- <sup>2</sup> Nano and Biomaterials Lab, Department of Chemistry, University of Agriculture, Faisalabad-38040-Pakistan.; drmuhammadasifhanif@gmail.com (M.A.H.)
- <sup>3</sup> Institute of Nanoscience and Nanotechnology (ION2), Universiti Putra Malaysia, 43400 UPM Serdang, Selangor, Malaysia. e-mail@e-mail.com
- <sup>4</sup> Department of Chemistry, Government College Women University Faisalabad (GCWUF), Faisalabad, Pakistan. asmarana\_hanif@yahoo.com (A.H.)
- <sup>5</sup> United States Department of Agriculture, Agricultural Research Service, National Center for Agricultural Utilization Research, Bio-Oils Research Unit, Peoria, IL 61604, USA; bryan.moser@usda.gov
- <sup>6</sup> Chemistry Department, College of Science, King Saud University, Riyadh 1145, Saudi Arabia aalsalme@ksu.edu.sa (A.A.)
- \* Correspondence: haq\_nawaz@uaf.edu.pk (H.N.B.); umer.rashid@upm.edu.my or dr.umer.ra-shid@gmail.com (U.R.); Tel.: +60-3-97697393 (U.R.)

## Characterization

IR spectroscopy was used to analyze the type of functional groups present on the catalyst. The FTIR spectra of NaO<sub>2</sub>/SiO<sub>2</sub>/PFC/Granite is shown in Figure S1. The peak appears at 775 cm<sup>-1</sup> suggested Si-O-Si stretching vibrations. Hence, the region 781-436 cm<sup>-1</sup> corresponded to the presence of quartz. Also, a signal at 997 cm<sup>-1</sup> was assigned to characteristic bands of silicates, which are related to stretching vibrations of Si-O or Al-O [1]. The peak at 1373 cm<sup>-1</sup> indicated sodium and potassium linkages to oxygen present in granite [2]. The signal at 1340 cm<sup>-1</sup> was attributed to ferrihydrite. The sharp bands at 699 cm<sup>-1</sup> were attributed to Fe-O-H bending vibrations [3].

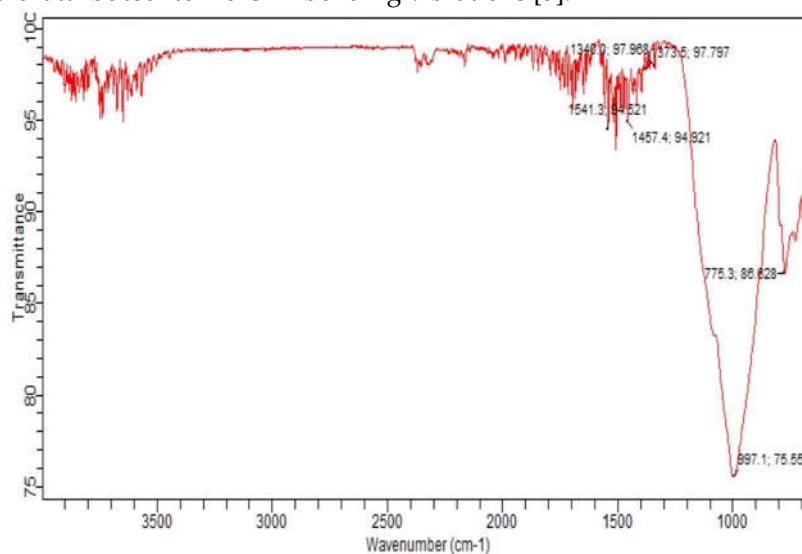

Figure S1. FTIR spectra of NaO<sub>2</sub>/SiO<sub>2</sub>/PFC/Granite

SEM analysis was used to morphologically observe the prepared  $\text{NaO}_2/\text{SiO}_2/\text{PFC}/\text{Granite}$ . It was comprised of a rough surface with porous structure. The porous structure provided a large surface area for reaction. It was observed that the prepared catalyst agglomerated together on the composite support surface, as depicted in Figure S2.

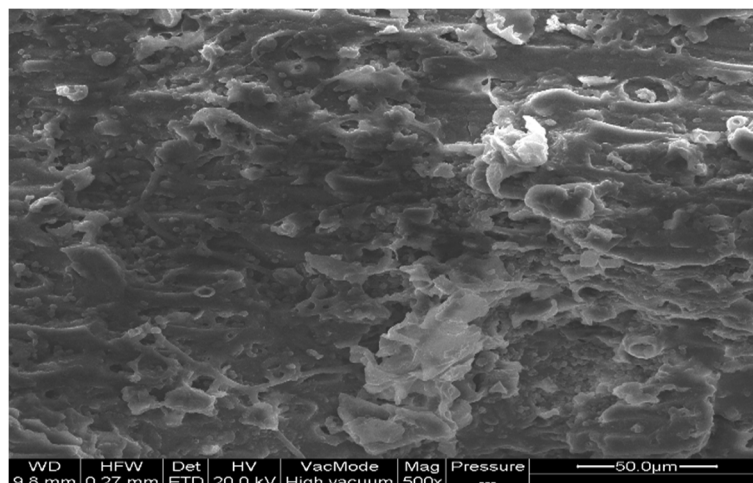

**Figure S2.** SEM of  $\text{NaO}_2/\text{SiO}_2/\text{PFC}/\text{Granite}$

## References

1. Abd El-Shafea, Y.M.; El-Sherbiny, M.A.; EL-Chaghaby, G.A. Treatment of aquaculture waste effluent to be reused in fish culture in Egypt. *Egyptian J. Aquat. Biolog. Fish.* **2019**, *23*, 233-243.
2. Aroke, U.; Abdulkarim, A.; Ogubunka, R. Fourier-transform infrared characterization of kaolin, granite, bentonite and barite. *ATBU J Environ. Technol.* **2013**, *6*, 42-53.
3. Mohapatra, M.; Layek, S.; Anand, S.; Verma, H.; Mishra, B. Structural and magnetic properties of Mg - doped nano -  $\alpha$  -  $\text{Fe}_2\text{O}_3$  particles synthesized by surfactant mediation - precipitation technique. *Physica Status Solidi.* **2013**, *250*, 65-72.
